# Supplementary material
Source: PubMed Central journal article supplement (PMC8222863)
Supplement: ALL-77-118-s001.pdf [file ALL-77-118-s001.pdf]

B.Healthy  
 B.COVID  
 PB.IgG.Healthy  
 PB.IgG.COVID  
 PB.IgM.Healthy  
 PB.IgM.COVID  
 PB.IgA.Healthy  
 PB.IgA.COVID  
 T.4Nve.Healthy  
 T.4Nve.COVID  
 T.4Mem.Healthy  
 T.4Mem.COVID  
 T.4.IFN-stim.Healthy  
 T.4.IFN-stim.COVID  
 T.8Mem.Healthy  
 T.8Mem.COVID  
 T.gd.Healthy  
 T.gd.COVID  
 NK.Healthy  
 NK.COVID  
 Mo.CD14.Healthy  
 Mo.CD14.COVID  
 Mo.CD16.Healthy  
 Mo.CD16.COVID  
 pDC.Healthy  
 pDC.COVID  
 DC.Healthy  
 DC.COVID  
 Neu.Healthy  
 Neu.COVID  
 Neu.Dev.Healthy  
 Neu.Dev.COVID  
 Eos.SC.Healthy  
 Eos.SC.COVID

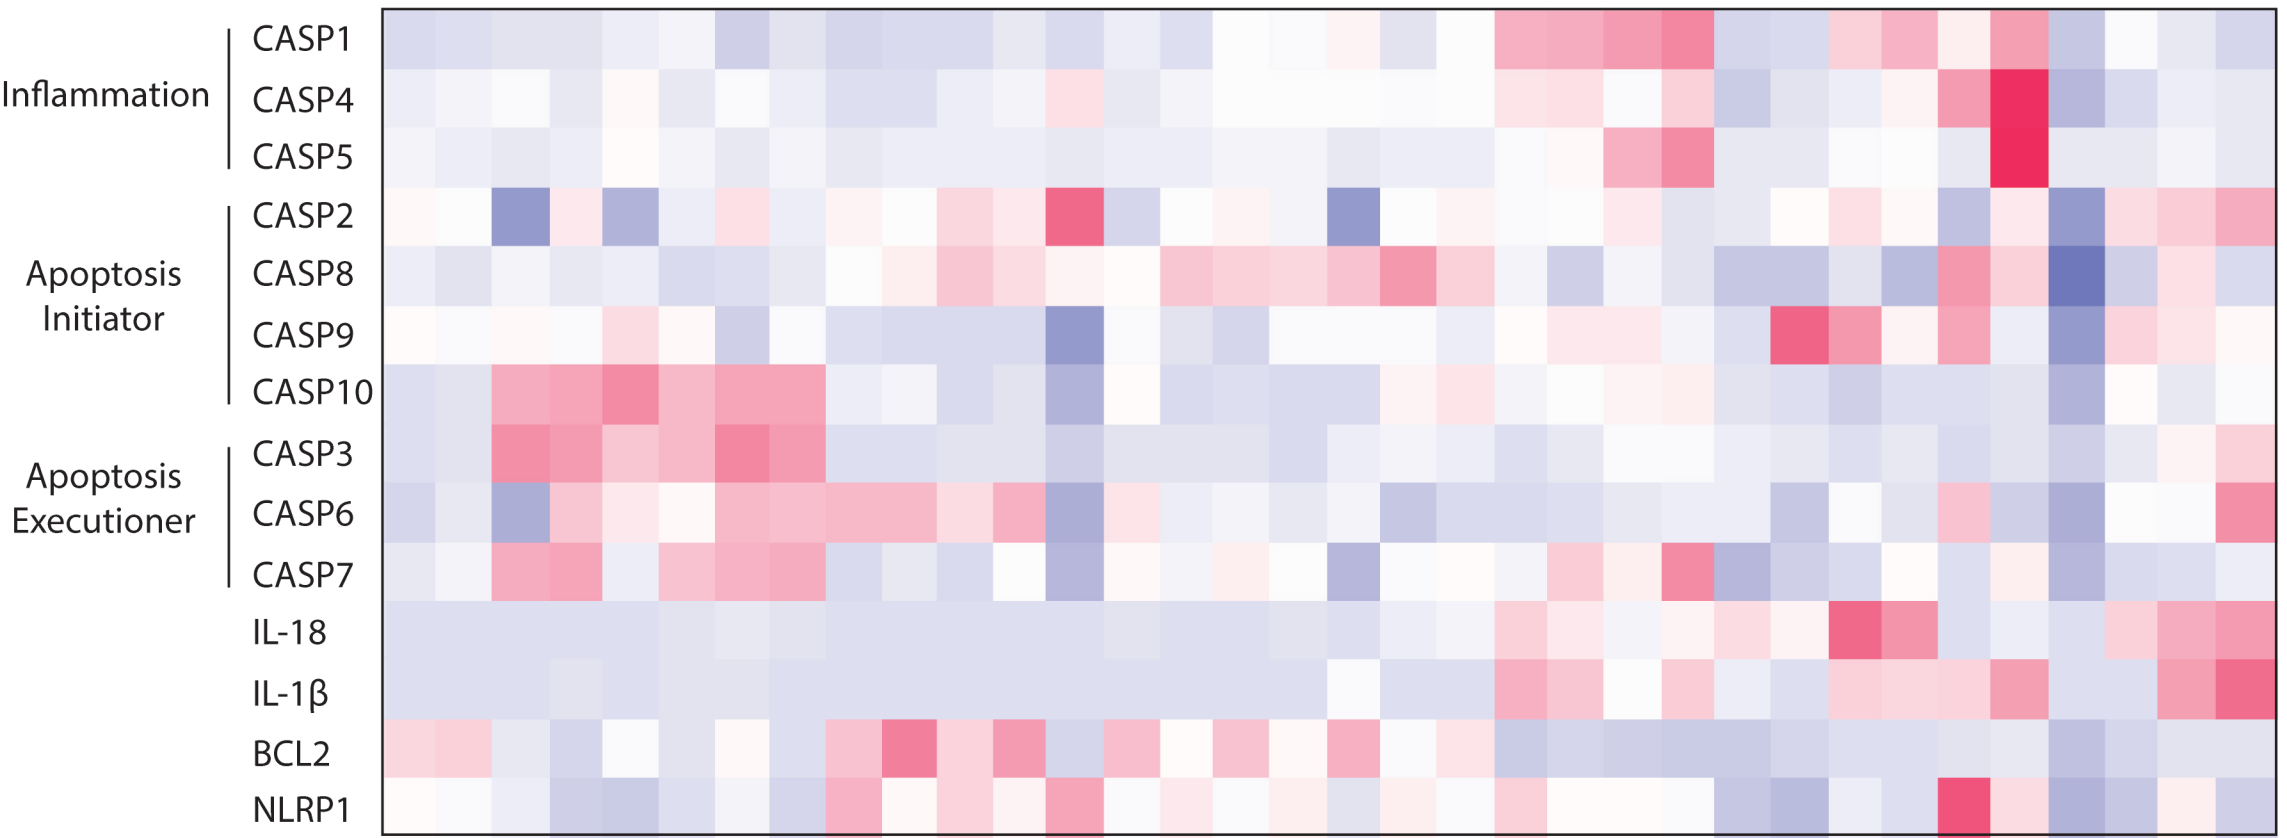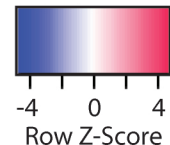

Supplementary Figure 1. Single-cell caspase gene expression of immune cells. Data was compiled from three COVID-19 participants and from 6 healthy controls. Expression values for the caspase genes were normalized by DESeq2.

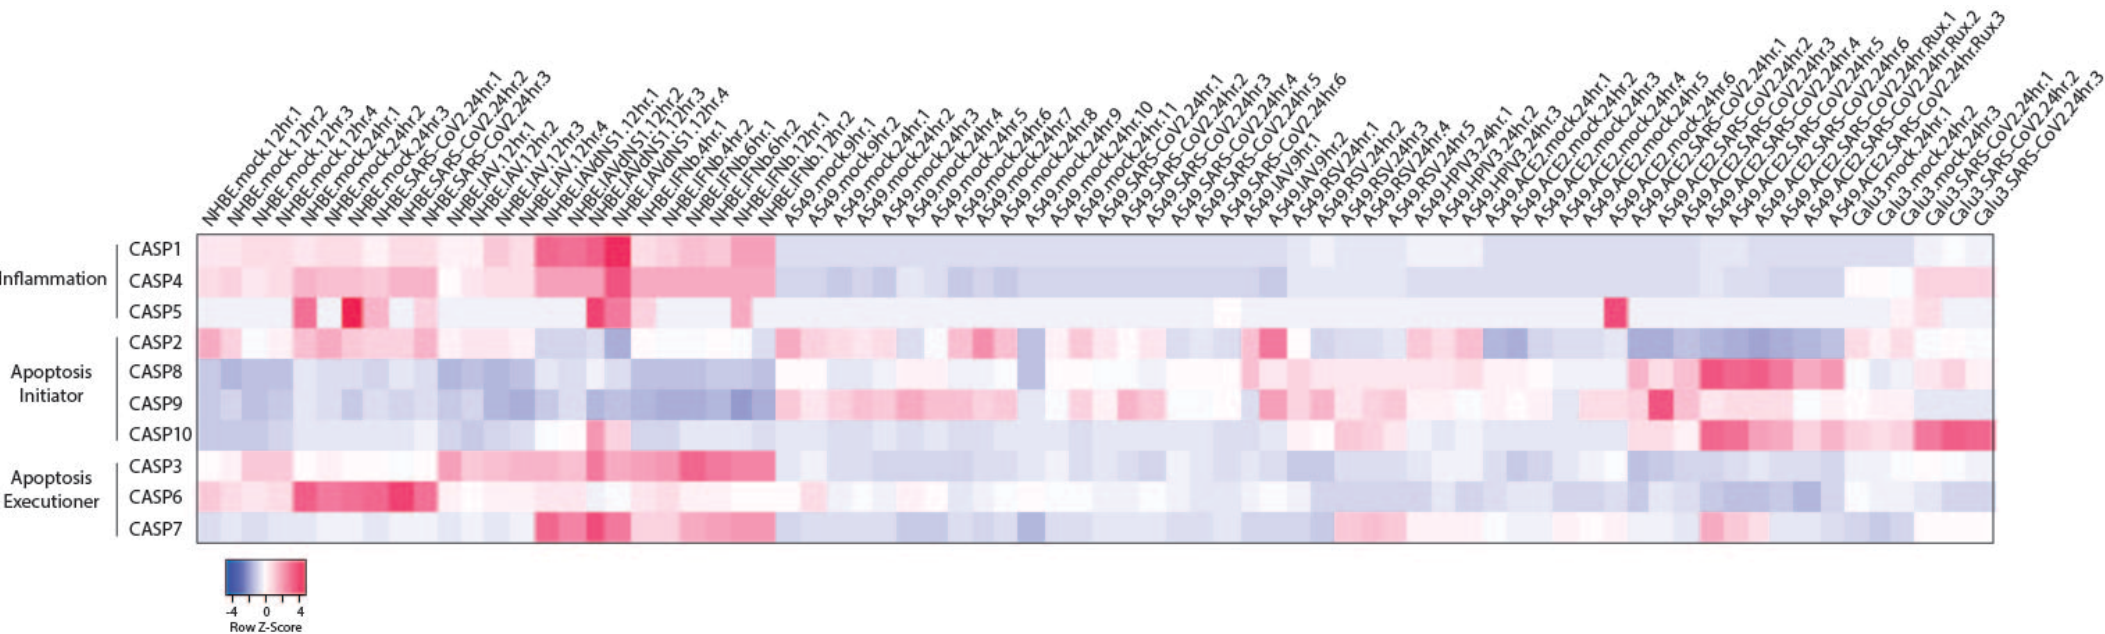

Supplementary Figure 2. Transcriptome profiling caspase datasets of in vitro SARS-CoV-2 infection models. Duration of infection/stimulation is as indicated. NHBE=primary human bronchial epithelial cells; A549=lung adenocarcinoma; Calu-3=human lung epithelial cells; IAV=Influenza A virus; IAVdNS1=IAV lacking antiviral NS1 gene; IFN-  $\beta$ =interferon beta; RSV=Respiratory Syncytial virus; HPIV3=human parainfluenza virus type 3.

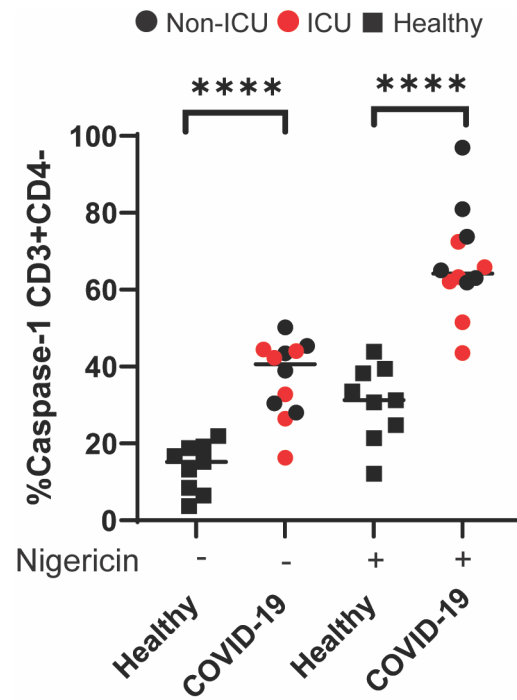

**Figure 3. Caspase-1 expression in immune cells.** Caspase-1 expression is shown in CD3+CD4- T cell lymphocytes from healthy and COVID-19 patients as indicated.

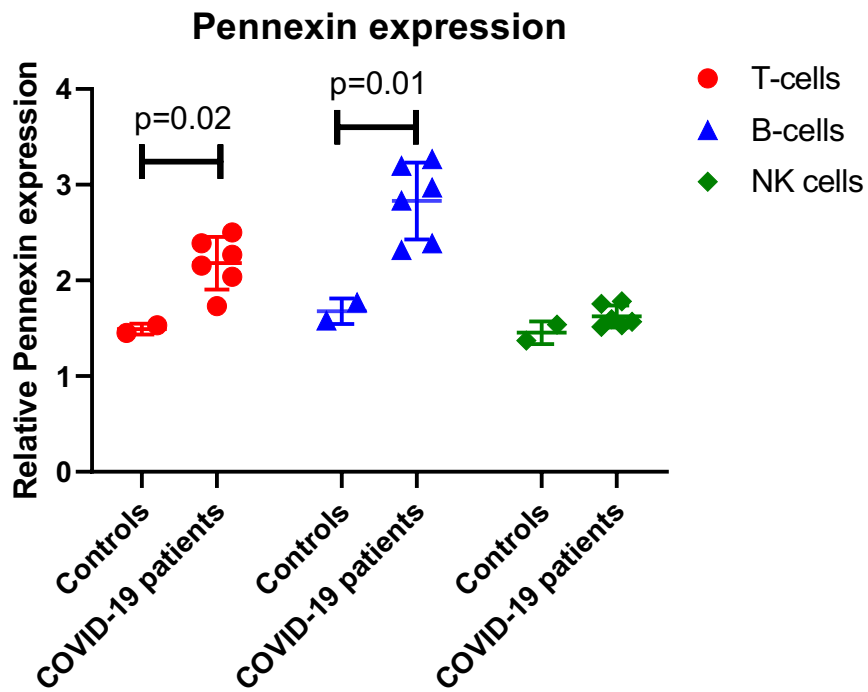

Supplemental Figure 4. Whole blood was stained with anti-CD3, anti-CD20, anti-CD16 and anti-CD56 to identify T-cells, B-cells, and NK-cells. The Pannexin level was calculated as MFI fold change compared to a FMO control. P-value calculated by a students t-test.

### Plasma IL-18 to CD4T cell caspase-1 correlation

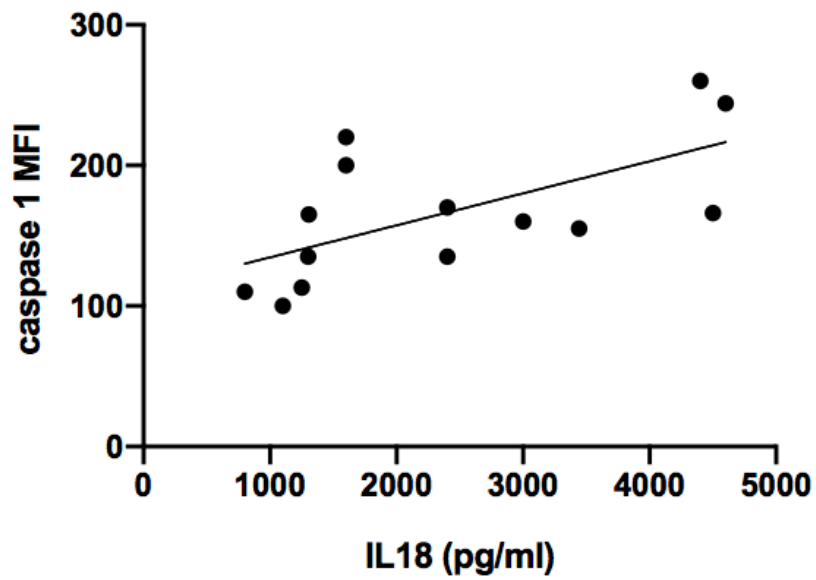

Supplemental Figure 5. Correlation of active Caspase-1 mean fluorescence intensity (MFI) in T-helper cells to serum IL-18 levels in hospitalized COVID-19.  $r = 0.023$ ,  $p = 0.016$

Supplemental Table 1 and Caspase-1 gating strategy

| Lymphocyte Monitoring                   | 18+ Normal Range |       | Healthy |       | Covid-19 + |       | Covid-19+ ICU |       | Covid-19+ Non ICU |     |
|-----------------------------------------|------------------|-------|---------|-------|------------|-------|---------------|-------|-------------------|-----|
|                                         | Mean             | SEM   | Mean    | SEM   | Mean       | SEM   | Mean          | SEM   | Mean              | SEM |
| Monocytes                               | 3.1 - 11.3       | 5.86  | 0.30    | 5.78  | 0.45       | 4.06  | 0.37          | 7.82  | 0.62              |     |
| Lymphocytes                             | 8.6 - 47.2       | 36.99 | 2.76    | 17.44 | 1.65       | 11.91 | 1.48          | 25.46 | 2.52              |     |
| CD3                                     | 60.3 - 90.6      | 73.30 | 3.01    | 70.94 | 1.54       | 68.33 | 1.98          | 74.61 | 2.50              |     |
| CD20                                    | 2.4 - 21.4       | 10.39 | 1.06    | 15.31 | 1.53       | 17.08 | 2.28          | 12.03 | 1.93              |     |
| CD3-CD16+ or CD56+                      | 2.3 - 24.7       | 14.13 | 2.62    | 10.22 | 1.09       | 10.03 | 1.38          | 11.00 | 1.95              |     |
| %TBNK                                   |                  | 97.82 | 0.38    | 96.47 | 0.44       | 95.43 | 0.69          | 97.64 | 0.34              |     |
| CD3+CD16+ or CD56+                      | 0.3 - 7.9        | 5.73  | 0.88    | 5.75  | 0.59       | 5.20  | 0.89          | 6.84  | 0.75              |     |
| <b>T Cell Monitoring and Activation</b> |                  |       |         |       |            |       |               |       |                   |     |
| CD3+/CD4+                               | 28.3 - 69.4      | 46.52 | 2.65    | 46.08 | 1.61       | 47.63 | 2.35          | 42.89 | 2.10              |     |
| CD3+/CD8+                               | 8.6 - 39.5       | 21.47 | 2.14    | 21.43 | 1.72       | 17.60 | 1.42          | 27.60 | 3.33              |     |
| CD3+/CD4-/CD8-                          | 0.4 - 5          | 4.49  | 0.81    | 2.77  | 0.26       | 2.58  | 0.30          | 3.26  | 0.49              |     |
| CD3/alpha-beta                          | 56 - 87.6        | 67.37 | 3.17    | 66.60 | 1.52       | 64.33 | 1.89          | 69.67 | 2.65              |     |
| CC3/gamma-delta                         | 0.2 - 5.8        | 3.36  | 0.81    | 1.93  | 0.31       | 1.50  | 0.35          | 2.67  | 0.58              |     |
| DNT/alpha-beta                          | 0.1 - 1.7        | 1.06  | 0.12    | 0.92  | 0.08       | 1.02  | 0.13          | 0.84  | 0.09              |     |
| DNT/gamma-delta                         | 0.2 - 4.3        | 3.24  | 0.79    | 1.57  | 0.26       | 1.21  | 0.29          | 2.20  | 0.47              |     |
| CD3+/CD8+/CD57+                         | 1.2 - 17.2       | 7.31  | 1.73    | 8.72  | 1.30       | 5.60  | 0.98          | 13.39 | 2.58              |     |
| CD3+/HLA-DR                             | 1.0 - 9.6        | 1.35  | 0.25    | 3.31  | 0.37       | 3.21  | 0.31          | 3.35  | 0.84              |     |
| CD3+/CD25                               | 11.2 - 53.9      | 12.20 | 1.20    | 13.67 | 0.54       | 14.05 | 0.82          | 12.76 | 0.60              |     |
| T4/T8 Ratio                             | 0.71 - 4.3       | 2.50  | 0.25    | 2.80  | 0.29       | 3.25  | 0.44          | 2.04  | 0.30              |     |
| <b>T Cell Memory</b>                    |                  |       |         |       |            |       |               |       |                   |     |
| CD3/CD4/CD45RO                          | 9.9 - 37.7       | 26.70 | 1.77    | 32.43 | 1.98       | 29.27 | 2.92          | 35.82 | 2.61              |     |
| CD3/CD4/CD45RA                          | 3.4 - 37.9       | 23.68 | 2.19    | 19.79 | 2.37       | 26.12 | 3.38          | 10.87 | 2.30              |     |
| CD3/CD8/CD45RO                          | 1.0 - 8.3        | 6.71  | 1.00    | 5.02  | 0.67       | 3.41  | 0.58          | 7.39  | 1.28              |     |
| CD3/CD8/CD45RA                          | 2.4 - 23         | 15.09 | 1.77    | 16.22 | 1.54       | 14.88 | 1.79          | 18.73 | 2.90              |     |
| CD4/CRTH2                               | 0.2 - 3.29       | 1.31  | 0.14    | 1.46  | 0.12       | 1.41  | 0.15          | 1.53  | 0.21              |     |
| CD4/CD45RO/CRTH2                        | 0.07 - 2.97      | 1.06  | 0.11    | 1.13  | 0.11       | 1.07  | 0.15          | 1.22  | 0.18              |     |
| CD8/CRTH2                               | <2.43            | 3.67  | 1.19    | 1.72  | 0.35       | 1.45  | 0.40          | 2.07  | 0.67              |     |
| CD8/CD45RO/CRTH2                        | <1.45            | 1.76  | 0.58    | 0.72  | 0.20       | 0.47  | 0.12          | 1.09  | 0.46              |     |
| <b>B Cell Maturation and Subtypes</b>   |                  |       |         |       |            |       |               |       |                   |     |
| CD20/CD5                                | 0.1 - 4.5        | 0.97  | 0.16    | 0.66  | 0.11       | 0.65  | 0.15          | 0.67  | 0.18              |     |
| CD20/CD27                               | 0.4 - 5.4        | 1.91  | 0.26    | 2.19  | 0.31       | 2.23  | 0.40          | 1.95  | 0.54              |     |
| CD21 B-cells                            | 73.2 - 95        | 89.17 | 0.92    | 57.27 | 3.43       | 53.80 | 4.66          | 63.54 | 5.40              |     |
| CD21 dim B-cells                        | 3.7 - 21.1       | 8.35  | 0.56    | 34.03 | 2.95       | 35.48 | 3.85          | 29.90 | 4.87              |     |
| IgG B-cells                             | 2.5 - 17.4       | 4.80  | 0.40    | 8.21  | 0.71       | 7.67  | 0.78          | 9.17  | 1.42              |     |
| IgA B-cells                             | 1.5 - 7.3        | 6.61  | 0.62    | 5.55  | 0.55       | 5.83  | 0.86          | 4.82  | 0.63              |     |
| IgM B-cells                             | 69.1 - 97.6      | 85.39 | 0.79    | 84.49 | 0.98       | 84.29 | 1.24          | 84.73 | 1.81              |     |
| IgD B-cells                             | 69.0 - 97.6      | 85.17 | 1.08    | 77.97 | 1.39       | 77.42 | 1.54          | 78.48 | 2.81              |     |
| IgMCD27 B-cells                         | 5.6 - 27.2       | 13.60 | 1.43    | 8.76  | 0.84       | 9.02  | 1.17          | 8.79  | 1.36              |     |
| <b>Dendritic Cell Monitoring</b>        |                  |       |         |       |            |       |               |       |                   |     |
| DC                                      | 0.04 - 0.5       | 0.17  | 0.02    | 0.13  | 0.03       | 0.09  | 0.02          | 0.19  | 0.06              |     |
| CD11d                                   | 32.6 - 86        | 60.17 | 3.03    | 60.89 | 4.22       | 50.91 | 5.82          | 72.42 | 5.44              |     |
| BDCA2                                   | 8.9 - 59.9       | 31.10 | 3.35    | 9.80  | 1.77       | 8.02  | 2.02          | 13.38 | 3.27              |     |

| Lymphocyte Monitoring                   | % CD3+CD4+ Caspase 1 Nigericin - |
|-----------------------------------------|----------------------------------|
| Monocytes                               | 0.1902                           |
| Lymphocytes                             | 0.5053                           |
| CD3                                     | 0.4789                           |
| CD20                                    | 0.2798                           |
| CD3-CD16+ or CD56+                      | <b>0.0014</b>                    |
| %TBNK                                   | 0.2105                           |
| CD3+CD16+ or CD56+                      | 0.2402                           |
| <b>T Cell Monitoring and Activation</b> |                                  |
| CD3+/CD4+                               | 0.4624                           |
| CD3+/CD8+                               | 0.7696                           |
| CD3+/CD4-/CD8-                          | <b>0.019</b>                     |
| CD3/alpha-beta                          | 0.2596                           |
| CC3/gamma-delta                         | <b>0.0169</b>                    |
| DNT/alpha-beta                          | 0.6647                           |
| DNT/gamma-delta                         | <b>0.0043</b>                    |
| CD3+/CD8+/CD57+                         | 0.6792                           |
| CD3+/HLA-DR                             | 0.4755                           |
| CD3+/CD25                               | 0.5518                           |
| T4/T8 Ratio                             | 0.7592                           |
| <b>T Cell Memory</b>                    |                                  |
| CD3/CD4/CD45RO                          | 0.1758                           |
| CD3/CD4/CD45RA                          | 0.1213                           |
| CD3/CD8/CD45RO                          | 0.5101                           |
| CD3/CD8/CD45RA                          | 0.4088                           |
| CD4/CRTH2                               | <b>0.0081</b>                    |
| CD4/CD45RO/CRTH2                        | <b>0.007</b>                     |
| CD8/CRTH2                               | 0.963                            |
| CD8/CD45RO/CRTH2                        | 0.2389                           |
| <b>B Cell Maturation and Subtypes</b>   |                                  |
| CD20/CD5                                | 0.3127                           |
| CD20/CD27                               | 0.2098                           |
| CD21 B-cells                            | 0.6533                           |
| CD21 dim B-cells                        | 0.9084                           |
| IgG B-cells                             | 0.107                            |
| IgA B-cells                             | 0.3013                           |
| IgM B-cells                             | 0.1667                           |
| IgD B-cells                             | 0.1857                           |
| IgMCD27 B-cells                         | 0.1732                           |
| <b>Dendritic Cell Monitoring</b>        |                                  |
| DC                                      | 0.1093                           |
| CD11d                                   | 0.8607                           |
| BDCA2                                   | <b>0.0187</b>                    |

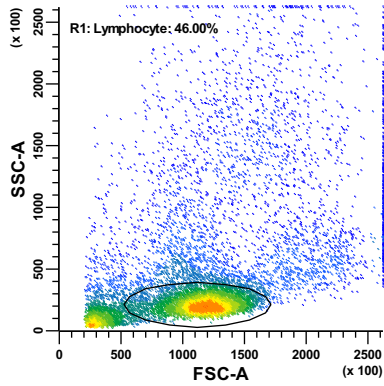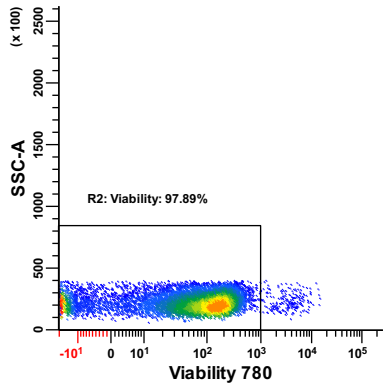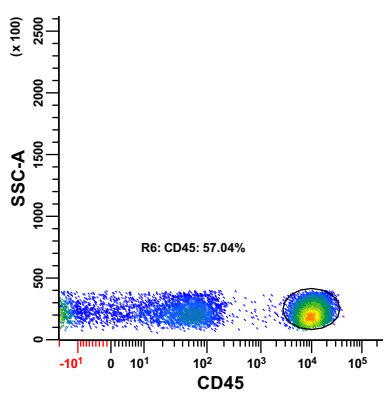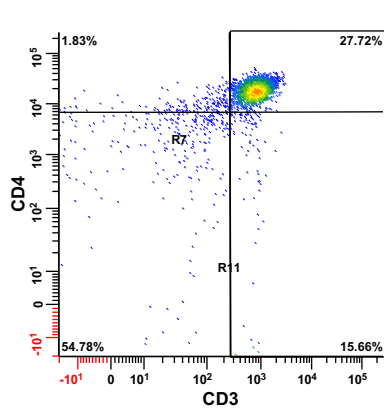

## CD4 T Cells

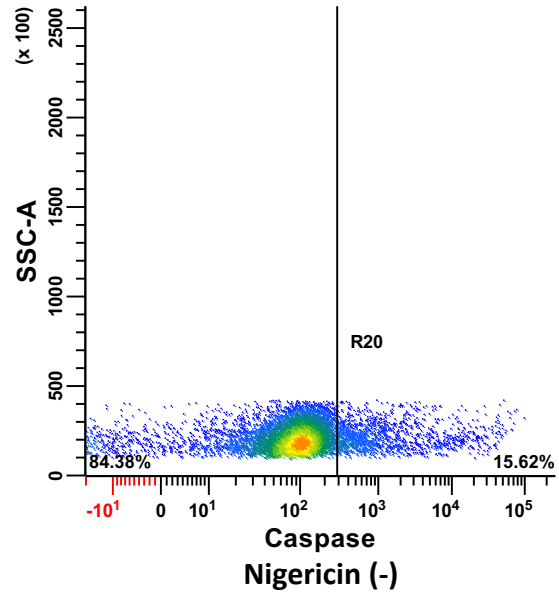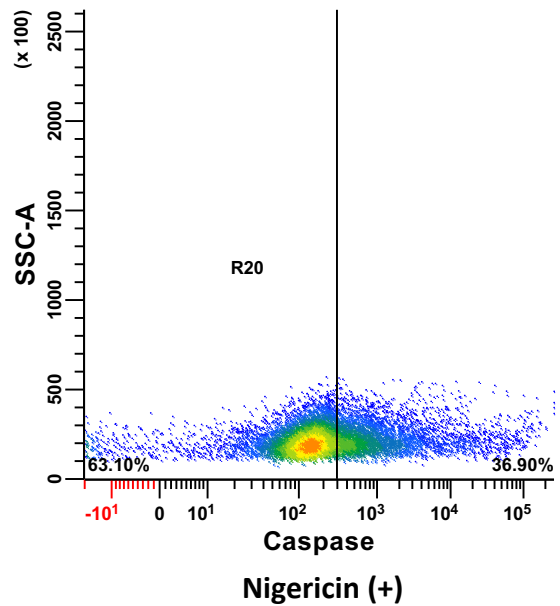

PBMC Gating Scheme: Lymphocytes are gated on the FSC vs SSC Plot. Viable CD45+ cells gated on the CD45 vs SSC plot. The CD45+CD4+ cells are identified on the CD3 vs CD4 plot. The CD4+ Caspase cells are shown.

### Supplementary information on antibodies:

The antibodies utilized from Thermo Fisher Scientific were CD56 SB436 [TULY56], CD45 eF506 [HI130], CD3 FITC [SK7], CD16 PE [B73.1], CD8 PerCP-eF710 [SK1] CD14 PE-CY7 [61D3], CD4 APC [SK-3], CD20 APC-eF780 [2H7] CD25 EF450 [CD25-4E3], CD57 FITC [TBo1], TCR $\gamma$ - $\delta$  PE [B1.1], CD4 PerCP-eF710 [SK-3], CD3 PE-CY7 [SK7], TCR  $\alpha\beta$  APC [IP26], HLA-DR AF700 [LN3], CD8 APC-eF780 [SL1], IgD SB436 [IA6-2], IgA FC Secondary Antibody FITC, IgG FC Secondary Antibody PE, IgM PerCP-eF710 [SA-DA4], CD19 PE-CY7 [SJ25C1], CD27 APC [O323], CD5 FITC [UCHT2], CD21 PE [HB5], CD27 PerCP-eF710 [O323], CD45RA FITC [HI100], CD45RO PerCP-eF710 [UCHL1], CD294 APC [BM16], CD4 AF700 [RPA-T4], CD3 FITC [SK7], CD14 FITC [61D3], CD16 FITC [3G8], CD19 FITC [SJ25-C1], CD20 FITC [2H7], CD56 FITC [TULY56], CD34 FITC [4H11], CD11c PE [3.9], HLA-DR PerCP-EF710 [L243], CD303a APC [201A], CD4 SB600 [SK-3], CD45RA FITC [HI100], CD3 PE-CY7 [SK7], CD8 AF700 [SK1], CCR5 APC [NP-6G4], CD25 APC [BC96], CD317 PE [26F8], IL-6 PE-CY7 [MQ2-13A5], MIP1- $\beta$  APC [FL34Z3L].

The antibodies utilized from BD Bioscience were HLADR BV480 [G46-6], CD38 PerCP-CY5.5 [HIT2], CD28 APC [CD28.2], CD45 APC H7 [2D1], CD278 BV421 [DX29], CXCR5 PerCP-CY5.5 [RF8B2], CD127 BV480 [HIL-7R-M21], CD45RO PerCP-CY5.5 [UCHL1], CD20 APC-H7 [2H7], CD11b BV421 [ICRF44], CD16 FITC [NKP15], MIP1- $\alpha$  PE [11A3], HLA-DR PerPC-Cy5.5 [L243]. TNF- $\alpha$  BV421 [Mab11] was from Biolegend (San Diego, CA).
